# Supplementary material for: Evidence of a role for interleukin-6 in anoikis resistance in oral squamous cell carcinoma
Source: PubMed Central journal article supplement (PMC9050791; doi:10.1007/s12032-022-01664-5), 2022-04-29

# Supplemental Figure S1

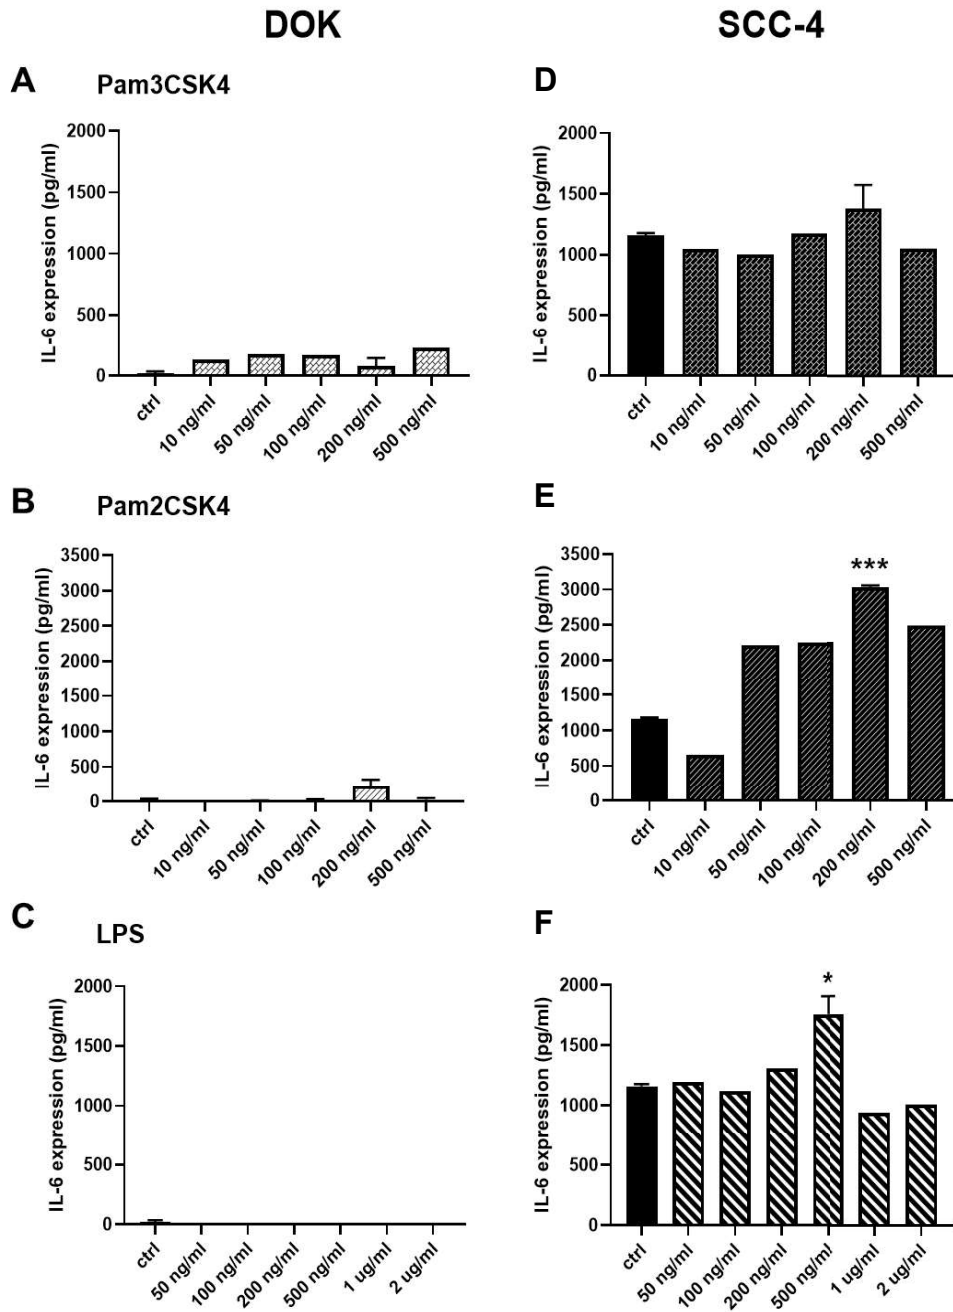

Supplemental Figure S2

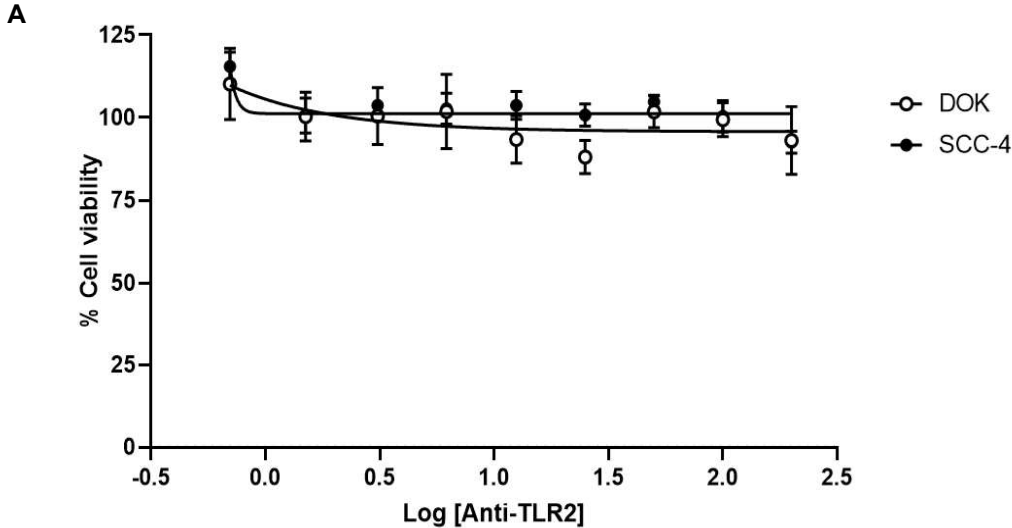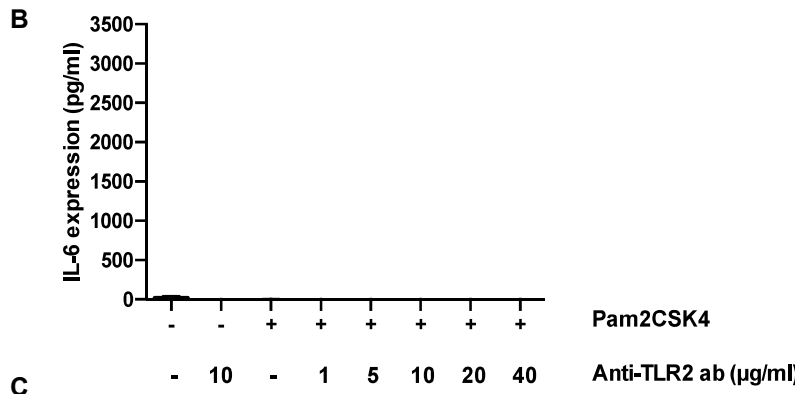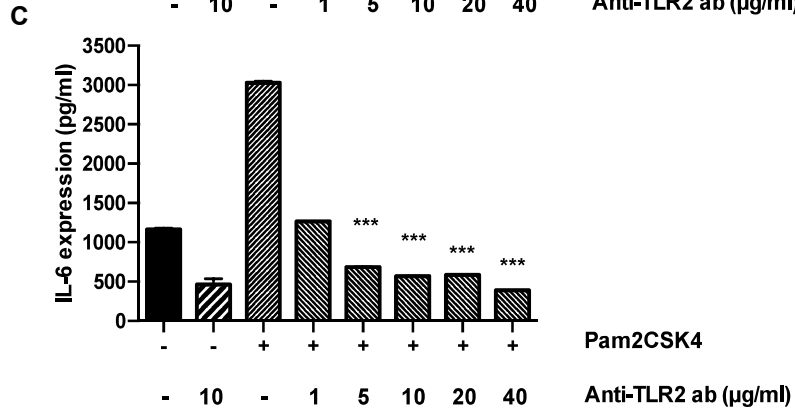

### Supplementary Figure S3

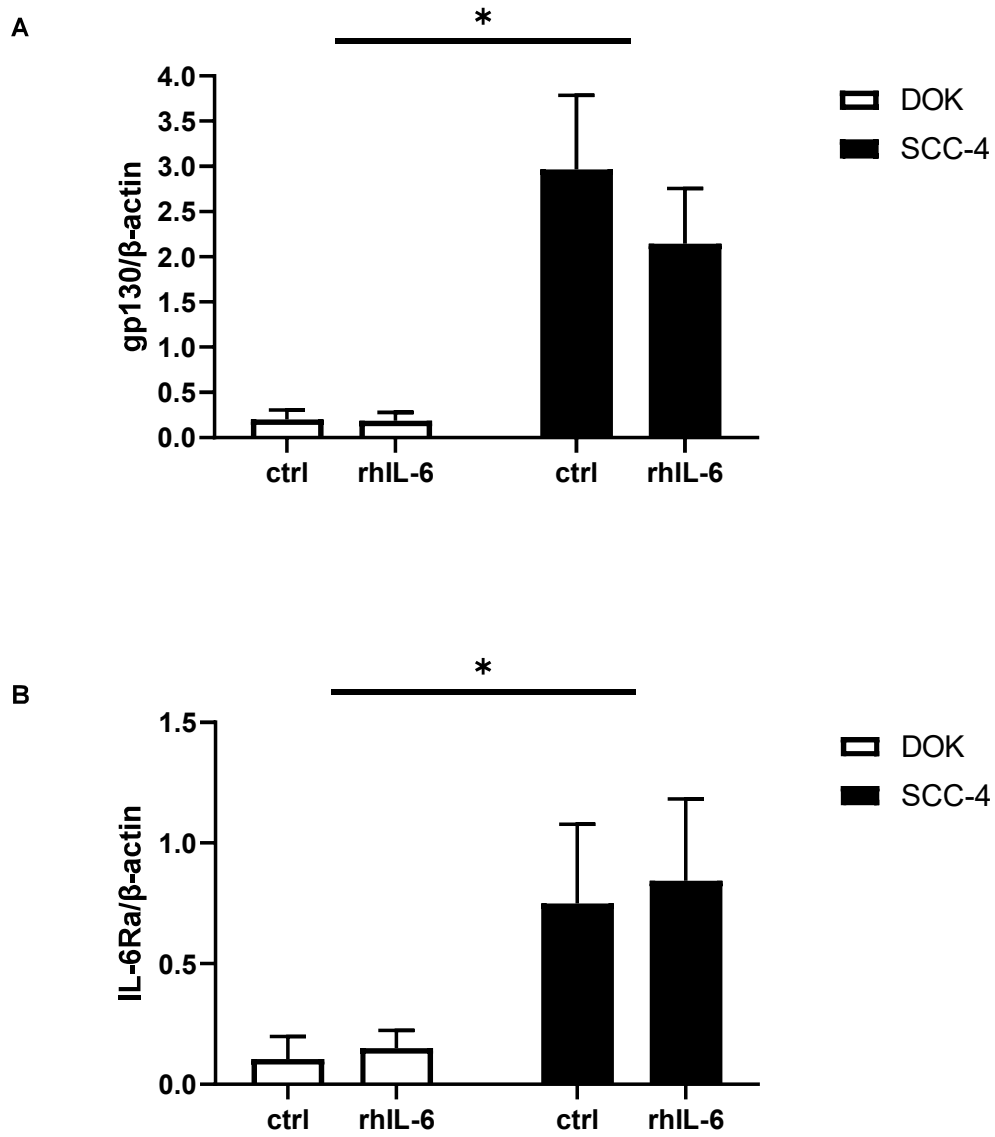

# Supplementary Figure S4

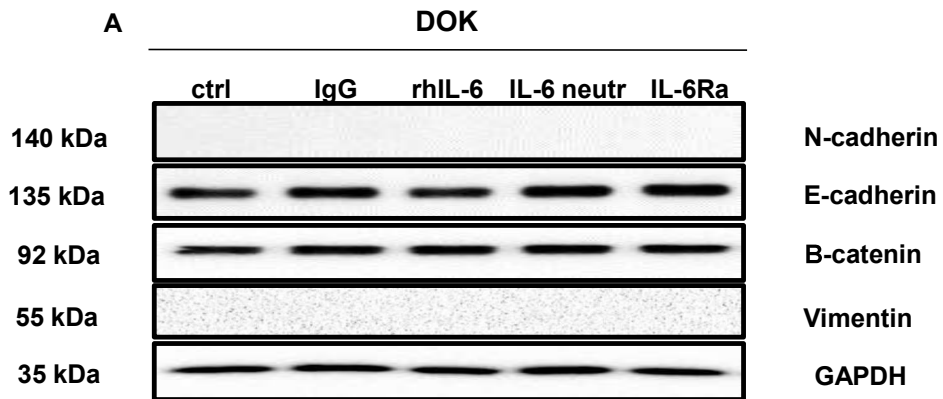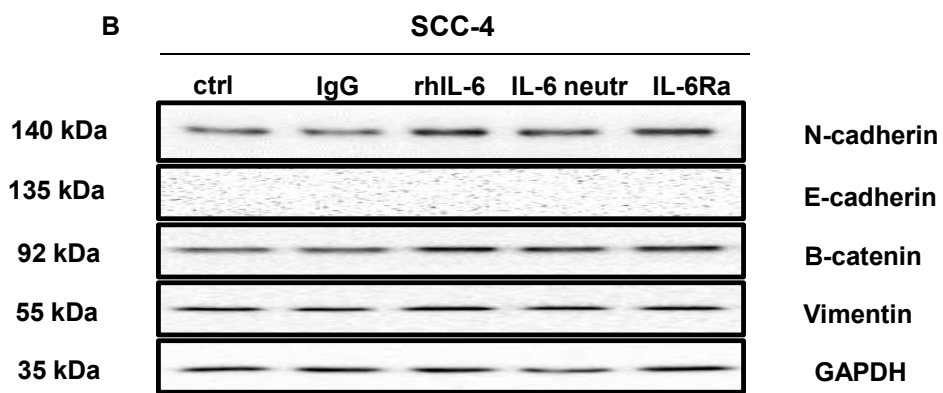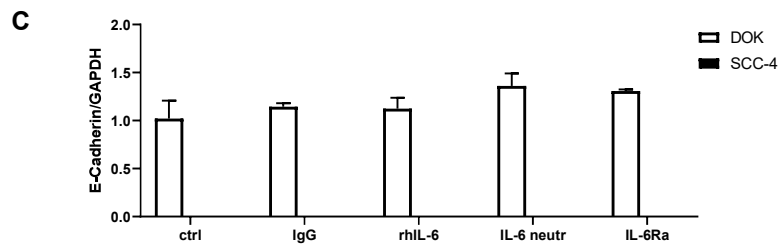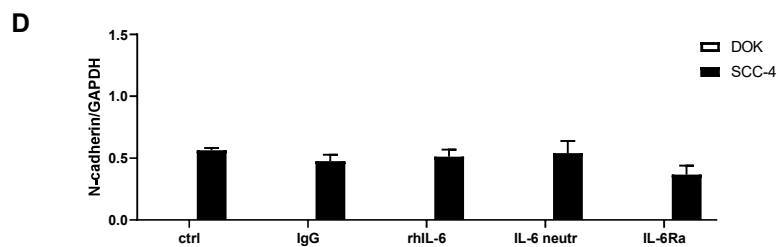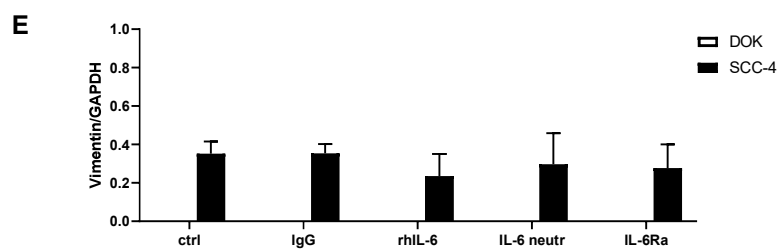

Supplementary Figure S5

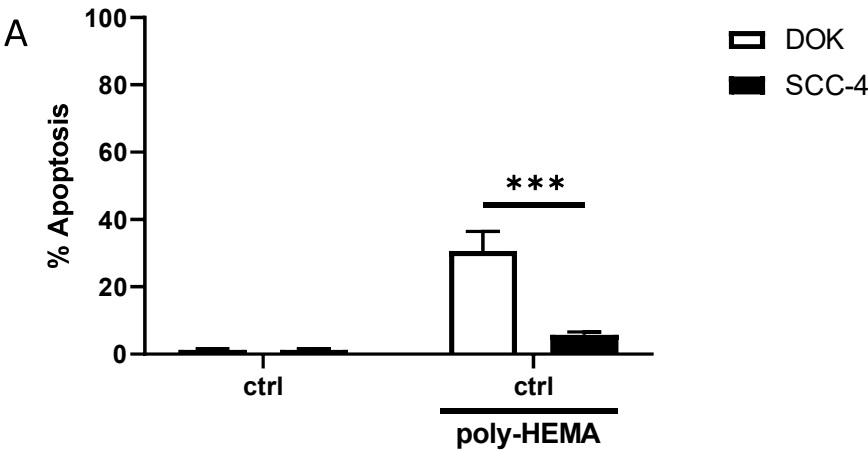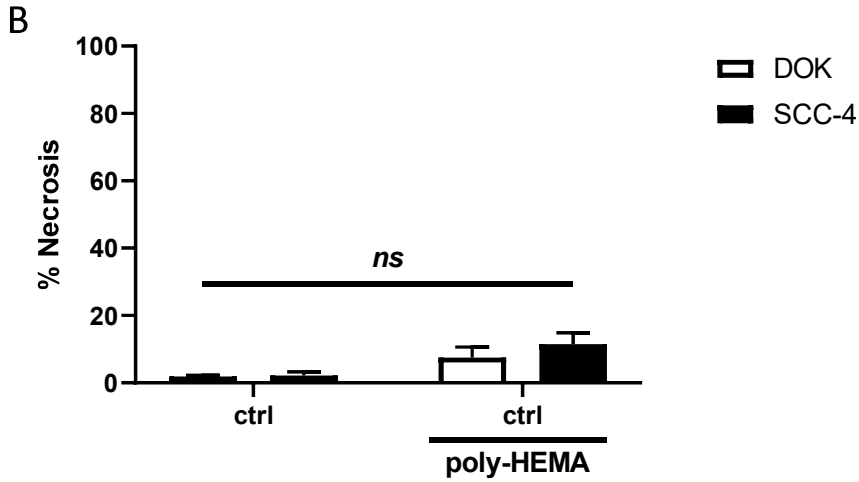

Supplementary Figure S6

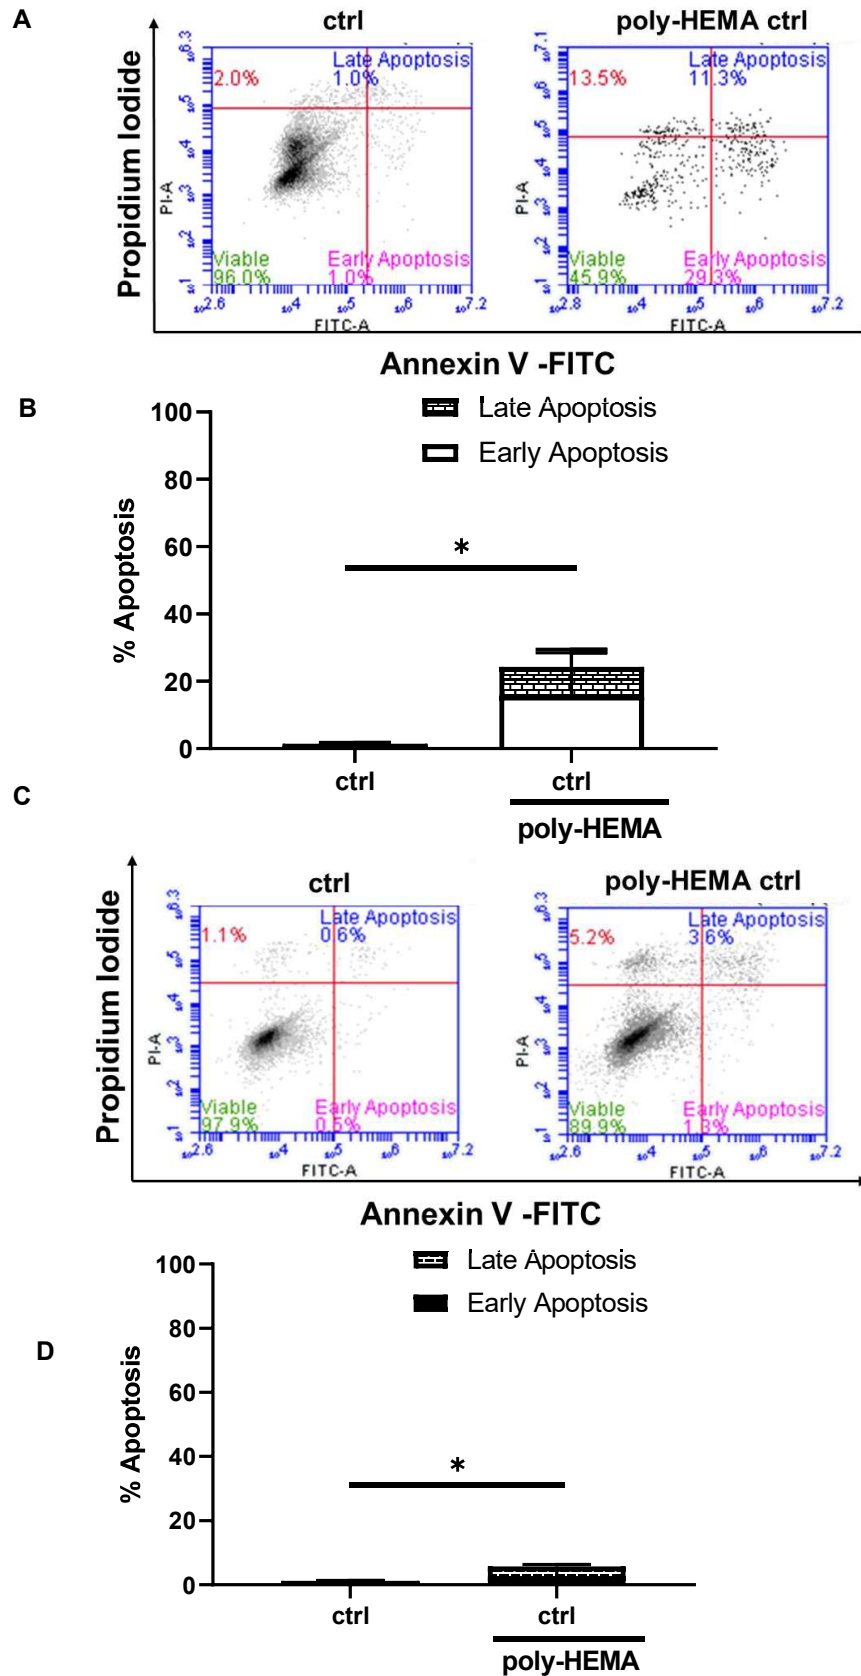

Supplement: 12032_2022_1664_MOESM1_ESM.pdf [file 12032_2022_1664_MOESM1_ESM.pdf]
